# Supplementary material for: High-speed digital photographic study of an inductively coupled plasma during laser ablation: comparison of dried solution aerosols from a microconcentric nebulizer and solid particles from laser ablation
Source: Royal Society of Chemistry journal article supplement (doi:10.1039/b302546m), 2003-01-01
Supplement: captions to videos.doc [file captions%20to%20videos.doc]

**Captions to videos**

**Video 1.** High-speed video of the ICP during 266-nm laser ablation of a Y2O3 pellet using argon as the sample-transport gas.

**Video 2.** High-speed video of the ICP during nebulization of a Y solution standard with a 100 L min-1 nebulizer. Argon was used as the sample-transport gas. Red clouds from large droplets occasionally cause flickering of the tip of the IRZ; few persist further downstream.

**Video 3.** High-speed video of the ICP during nebulization of a Y solution standard with a 20 L min-1 nebulizer. Argon was used as the sample-transport gas. The IRZ is faint and the tip is very stable; few red droplet clouds are evident.

**Video 4.** High-speed video of the ICP during nebulization of a Y solution standard with a pumped 100 L min-1 nebulizer and a cyclone spray chamber. Argon was used as the sample-transport gas. Droplet clouds and particle streaks are common in the red IRZ and blue NAZ.

**Video 5.** High-speed video of the ICP during 266-nm laser ablation of a Y2O3 pellet using helium as the sample transport gas and argon as make-up gas.

**Video 6.** High-speed video of the ICP during 266-nm laser ablation of a silicate glass doped with 12 wt% Y2O3. Argon was used as the sample-transport gas. The green emission in the NAZ is the result of imprecise color rendition by the 3-CCD camcorder; both the digital still camera and the naked eye correctly observed the normal blue emission color expected from excited Y+. Particle tracks are still evident but less frequent than when the Y2O3 pellet was ablated (videos 1 and 5).
